# Supplementary material for: Imparting pH and temperature dual-responsiveness in a micellar solution of cationic surfactants by introducing a hydrotrope
Source: Royal Society of Chemistry journal article supplement (doi:10.1039/d2sm00509c), 2022-01-01
Supplement: d2sm00509c1.pdf [file d2sm00509c1.pdf]

Electronic Supporting information

# Imparting pH and temperature dual-responsiveness in a micellar solution of cationic surfactant by introducing a hydrotrope

Dongmei Lv, Qi Liu, Chenyong Wang, Huijun Wu, Na Zhao, Baolin Yin, Xilian Wei\*,  
Jing Li\*

Shandong Provincial Key Laboratory of Chemical Energy Storage and Novel Cell Technology,  
College of Chemistry and Chemical Engineering, Liaocheng University, Liaocheng, Shandong  
252059, P. R. China

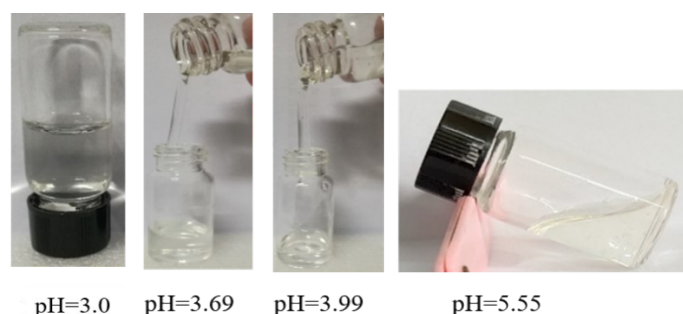

**Fig. 1** The macro-morphology of the mixed solution (40 mM R<sub>16</sub>HTAB/ 40 mM SHP) at different pH values under ambient temperature.

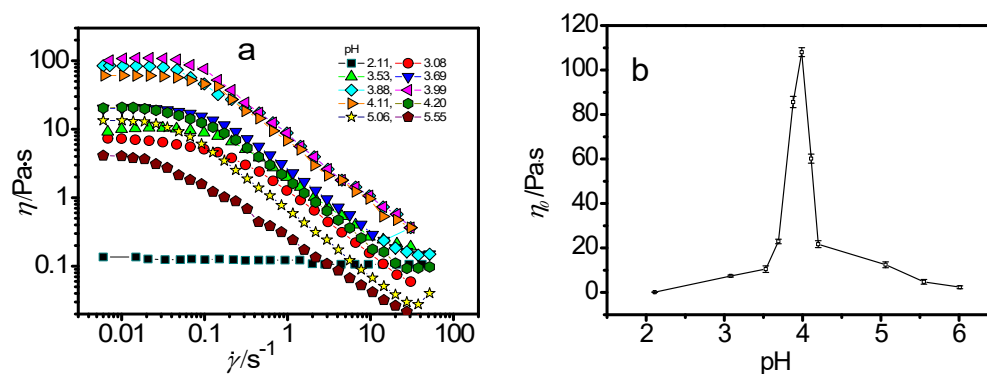

**Fig. 2** Steady-state curves (a) and variation in zero shear viscosity (b) for 40 mM R<sub>16</sub>HTAB/ 40 mM SHP solutions at different pH values at 25 °C

1. E-mail: weixilian@126.com

2. E-mail: muzianty@126.com
